# Supplementary material
Source: PubMed Central journal article supplement (PMC6035296)
Supplement: mmc1.pdf [file mmc1.pdf]

**Biophysical Journal, Volume 115**

**Supplemental Information**

**Oscillatory Switches of Dorso-Ventral Polarity in Cells Confined between Two Surfaces**

**Jonne Helenius, Mary Ecke, Daniel J. Müller, and Günther Gerisch**

## Supporting Material

### Supplemental Figures and Legends

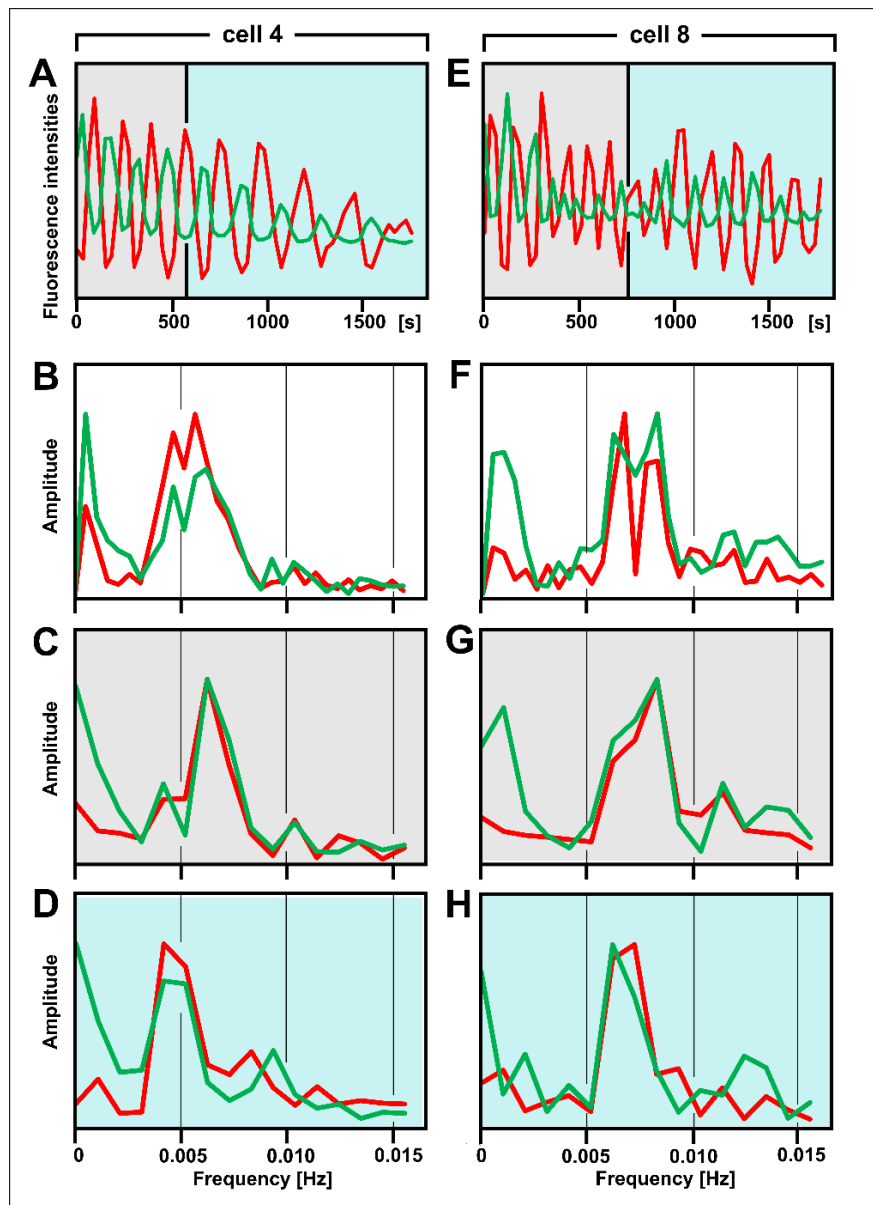

**Figure S1.** Decreasing frequencies during runs of PIP3 oscillations, revealed by splitting of the Fourier diagrams of two cells that in Figure 4 show a double peak of frequency. The oscillations of cell 4 are taken from Figure 4 F, those of cell 8 from Figure 4 E. See also Tables 1 and 2. A, the sequence of PIP3 oscillations on the glass (green) and the cantilever (red) surfaces is divided in an earlier (grey area) and a later part (blue area). B, F Fourier diagrams of the entire sequences, as compared to C, G Fourier diagrams of the earlier part or D, H of the later part of each sequence. For presentation, the amplitudes in the Fourier diagrams have been adjusted by setting the highest values to 1.

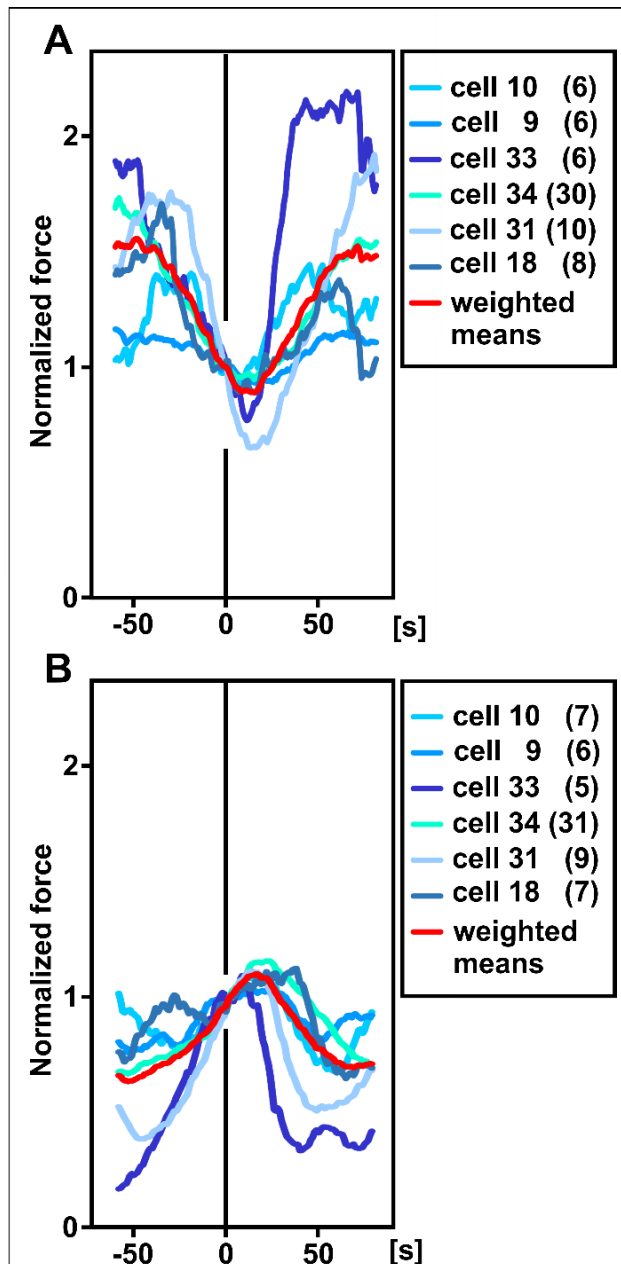

**Figure S2.** Summary of force generation in relation to PIP3 oscillations. Forces were determined in conjunction with recording the fluorescent PIP3 label at 10-s intervals. Data of 6 runs with varying numbers of half-periods are normalized to 1 at zero-time. In **A** zero-time is the time of fluorescence peaks, in **B** the time of crossing points in the fluorescence curves. Numbers in the panels correspond to the numbering of cells in Table 1; in brackets the multitude of half-periods recorded is indicated. The red curves represent the weighted means of the data from all six cells.

## Supplemental Movie Legends

**Movie S1.** Actin and PIP3 dynamics in a single cell on the surfaces attached to the cantilever (top panels) or to the glass coverslip (bottom panels). The cell expressed mRFP-LimE $\Delta$  as a label for filamentous actin (red) and GFP-PHcrac as a label for PIP3 (green). The same sequence of cell 13 is shown in Figure 1 C, D. The 319-s frame corresponds to the 0-s frame in Figure 1 D. See also Table 1. Bar, 10  $\mu\text{m}$ .

**Movie S2.** Crossing of waves that propagate on the glass (green) or the cantilever (red) surface. The cell expressed GFP-PHcrac as a label for PIP3. Cell 23 is also shown in Figure 2 A. The 288-s frame corresponds to the 0-s frame in Figure 2 A. See also Table 1. Bar, 10  $\mu\text{m}$ .

**Movie S3.** Surface switching in cell 30, showing oscillatory switching of PIP3 waves between the glass (green) and the cantilever (red) surfaces. The same cell is shown in Figures 3 and 7. The 0-s frames in these Figures correspond to the following frames in the Movie: in Figure 3 F to the 3150-s frame; in Figure 3 G to the 1380-s frame; in Figure 7 B to one before the 0-s frame; in Figure 7 D to the 1050-s frame. Quantitative data for this cell are displayed in Figures 4 H and 7. See also Tables 1 and 2. Bar, 10  $\mu\text{m}$ .
